# Supplementary material for: Dual temperature- and pH-responsive polymeric micelle for selective and efficient two-step doxorubicin delivery
Source: Royal Society of Chemistry journal article supplement (doi:10.1039/c7ra03579a), 2017-01-01

Electronic supplementary information

## Dual temperature- and pH-responsive polymeric micelle for selective and efficient two-step doxorubicin delivery

Yuki Hiruta\*, Yuki Kanda, Naoya Katsuyama, and Hideko Kanazawa\*

Faculty of Pharmacy, Keio University,  
1-5-30 Shibakoen, Minato-ku, Tokyo 105-8512, Japan

\*To whom correspondence should be addressed.

Email: hiruta-yk@pha.keio.ac.jp

kanazawa-hd@pha.keio.ac.jp

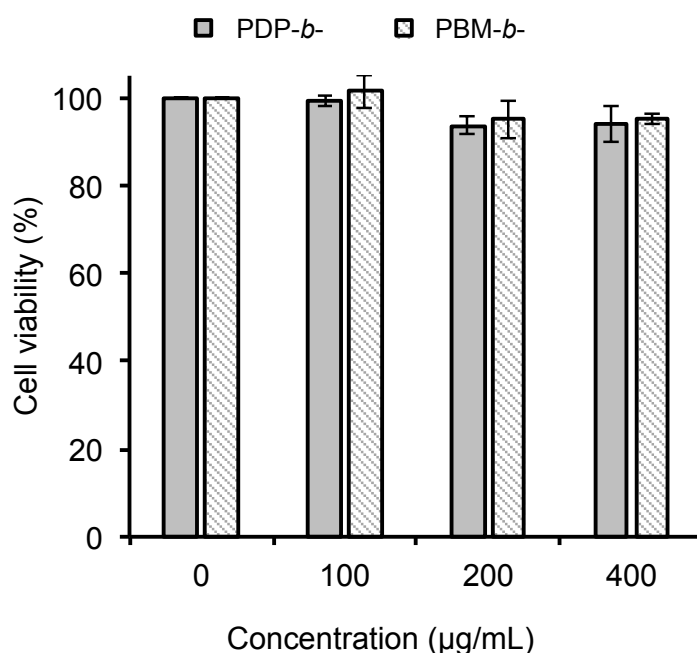

**Fig. S1** Concentration dependent viability of HeLa cells after incubation **PDP-*b*-ND**, and **PBM-*b*-ND** for 4 h at 42 °C. Cell viabilities were measured after 44 h. Error bars represent mean values ± 1σ ( $n = 3$ ).

# <sup>1</sup>H NMR spectrum of PDPA

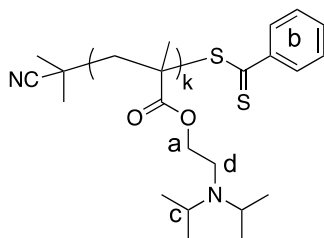

161123Ex35DPA

Sample Name:  
161123Ex35DPA  
Data Collected on:  
Agilent-400-MR-vnmrs400  
Archive directory:  
/home/vnmr1/vnmrsys/data/AUTO  
Sample directory:  
161123Ex35DPA\_20161123\_01  
FidFile: PROTON\_01

Pulse Sequence: PROTON (s2pul)  
Solvent: cdcl3  
Data collected on: Nov 23 2016

Operator: vnmr1

Relax. delay 1.500 sec  
Pulse 45.0 degrees  
Acq. time 3.500 sec  
Width 6410.3 Hz  
16 repetitions  
OBSERVE H1, 399.8646430 MHz  
DATA PROCESSING  
Line broadening 0.2 Hz  
FT size 65536  
Total time 1 min 20 sec

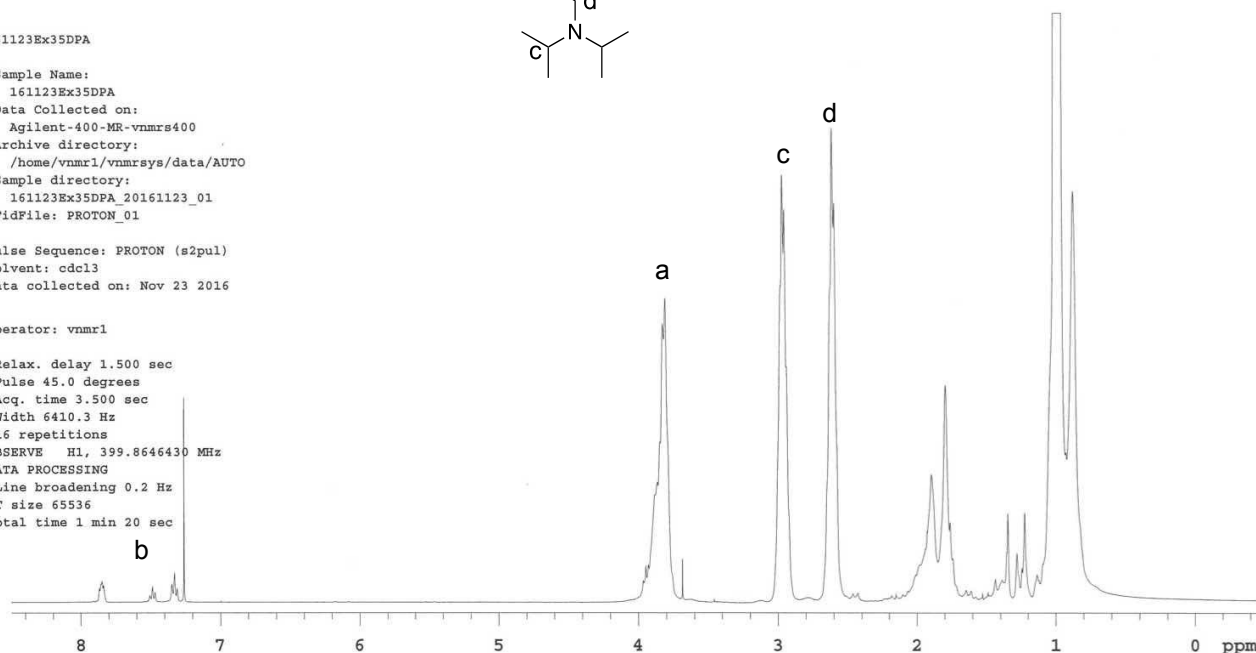

# <sup>1</sup>H NMR spectrum of PBMA

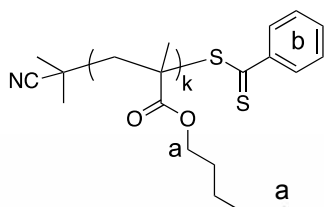

161215Ex38

Sample Name:  
161215Ex38  
Data Collected on:  
Agilent-400-MR-vnmrs400  
Archive directory:  
/home/vnmr1/vnmrsys/data/AUTO  
Sample directory:  
161215Ex38\_20161215\_01  
FidFile: PROTON\_01

Pulse Sequence: PROTON (s2pul)  
Solvent: cdcl3  
Data collected on: Dec 15 2016

Operator: vnmr1

Relax. delay 1.500 sec  
Pulse 45.0 degrees  
Acq. time 3.500 sec  
Width 6410.3 Hz  
16 repetitions  
OBSERVE H1, 399.8646435 MHz  
DATA PROCESSING  
Line broadening 0.2 Hz  
FT size 65536  
Total time 1 min 20 sec

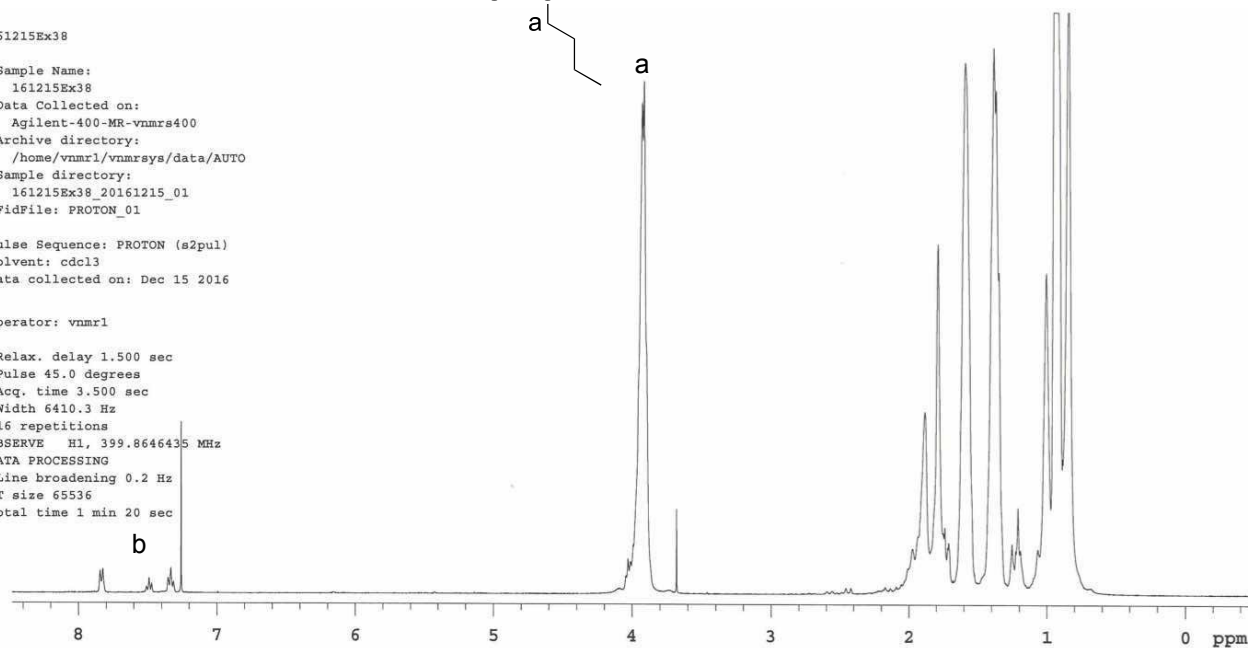

### $^1\text{H}$ NMR spectrum of PDP-*b*-ND

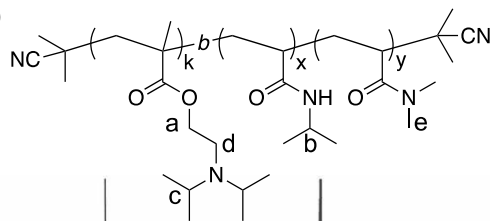

161210Ex37

Sample Name:  
161210Ex37  
Data Collected on:  
Agilent-400-MR-vnmrs400  
Archive directory:  
/home/vnmr1/vnmrsys/data/AUTO  
Sample directory:  
161210Ex37\_20161210\_01  
FidFile: PROTON\_01

Pulse Sequence: PROTON (s2pul)  
Solvent: cd3od  
Data collected on: Dec 10 2016

Operator: vnmr1

Relax. delay 1.500 sec  
Pulse 45.0 degrees  
Acq. time 3.500 sec  
Width 6410.3 Hz  
16 repetitions  
OBSERVE H1, 399.8662190 MHz  
DATA PROCESSING  
Line broadening 0.2 Hz  
FT size 65536  
Total time 1 min 20 sec

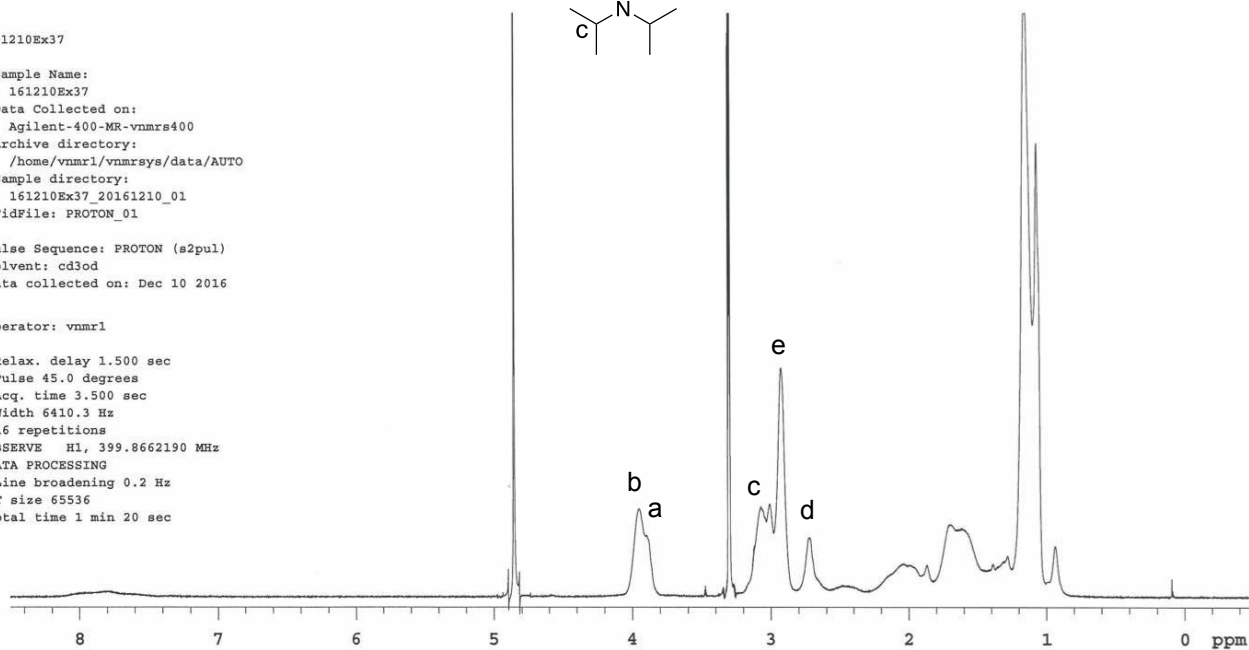

### $^1\text{H}$ NMR spectrum of PBM-*b*-ND

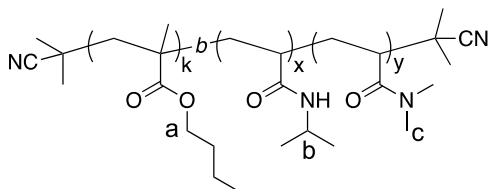

161221Ex40

Sample Name:  
161221Ex40  
Data Collected on:  
Agilent-400-MR-vnmrs400  
Archive directory:  
/home/vnmr1/vnmrsys/data/AUTO  
Sample directory:  
161221Ex40\_20161221\_01  
FidFile: PROTON\_01

Pulse Sequence: PROTON (s2pul)  
Solvent: cd3od  
Data collected on: Dec 21 2016

Operator: vnmr1

Relax. delay 1.500 sec  
Pulse 45.0 degrees  
Acq. time 3.500 sec  
Width 6410.3 Hz  
16 repetitions  
OBSERVE H1, 399.8662166 MHz  
DATA PROCESSING  
Line broadening 0.2 Hz  
FT size 65536  
Total time 1 min 20 sec

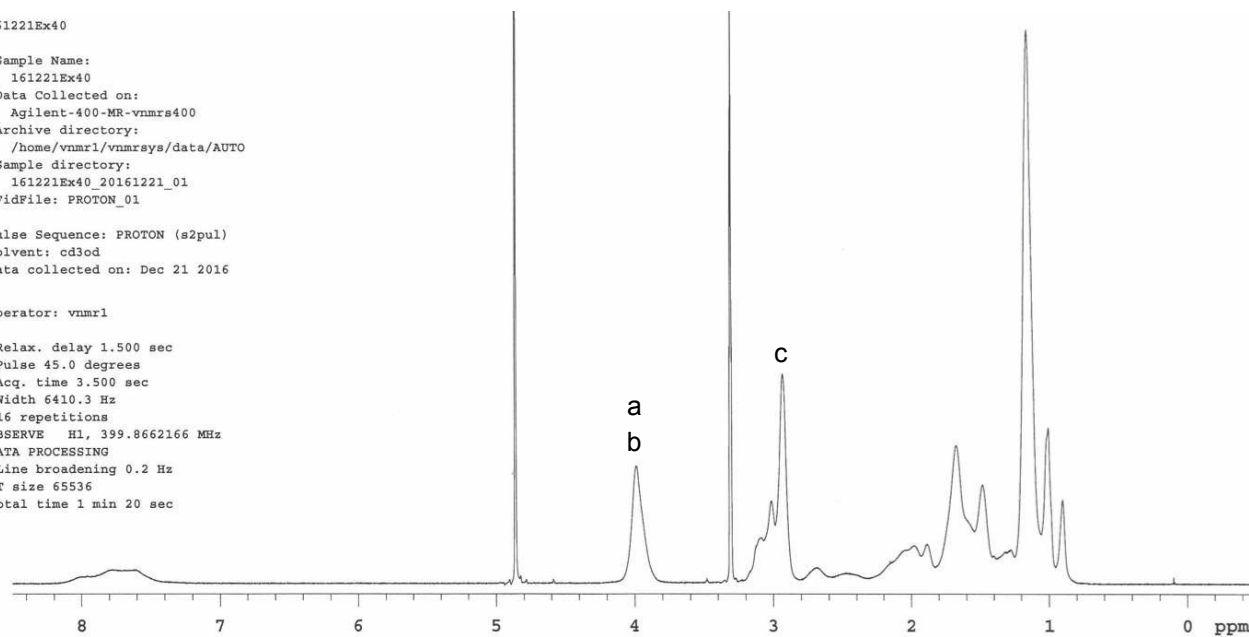

Supplement: c7ra03579a1.pdf [file c7ra03579a1.pdf]
